# Supplementary material for: Clinical Characteristics and Outcomes of Patients with Primary and Secondary Myelofibrosis According to the Genomic Classification Using Targeted Next-Generation Sequencing
Source: MDPI journal article supplement (doi:10.3390/cancers15153904), 2023-07-31
Supplement: s1 [file s1]

**Supplemental Table S1: Risk factors and stratification of myelofibrosis according to IPSS and MySEC-PM**

**Risk factors and stratification of myelofibrosis according to IPSS and MySEC**

|                  | <b>Risk factors</b>                              | <b>Risk stratification</b>                                                                                                                                                        |
|------------------|--------------------------------------------------|-----------------------------------------------------------------------------------------------------------------------------------------------------------------------------------|
| <b>MF-IPSS*</b>  | Age >65 years                                    | Low: 0 factors                                                                                                                                                                    |
|                  | Hemoglobin <10 g/dL                              | Intermediate-1: 1 factor                                                                                                                                                          |
|                  | Leukocytes >25x10 <sup>9</sup> /L                | Intermediate-2: 2 factors                                                                                                                                                         |
|                  | Circulating blasts ≥1%                           | High: 3 or more factors                                                                                                                                                           |
|                  | Constitutional symptoms                          |                                                                                                                                                                                   |
| <b>MySEC-PM¶</b> | Age (as a continuum variable)                    | Risk stratification (low, intermediate-1, intermediate-2, high) as a sum of the specified points for each variable, except age that is taken into account as a continuum variable |
|                  | Hemoglobin <11 g/dL (2 points)                   |                                                                                                                                                                                   |
|                  | Platelet count <150x10 <sup>9</sup> /L (1 point) |                                                                                                                                                                                   |
|                  | Circulating blasts ≥3% (2 points)                |                                                                                                                                                                                   |
|                  | Absence of <i>CALR</i> mutation (2 points)       |                                                                                                                                                                                   |
|                  | Constitutional symptoms (1 point)                |                                                                                                                                                                                   |

\*MF-IPSS: Myelofibrosis International Prognostic Scoring System. Cervantes F, Dupriez B, Pereira A et al. New prognostic scoring system for primary myelofibrosis based on a study of the International Working Group for Myelofibrosis Research and Treatment. *Blood*. 2009 Mar 26;113(13):2895-901.

¶MySEC-PM: Myelofibrosis Secondary to Polycythemia Vera and Essential Trombocythemia-Prognostic Model. Passamonti F, Giorgino T, Mora B et al. A clinical-molecular prognostic model to predict survival in patients with post polycythemia vera and post essential thrombocythemia myelofibrosis. *Leukemia*. 2017 Dec;31(12):2726-2731.

**Supplemental Table S2: List of genes included in the Next-Generation Sequencing panels that were used**

| Myeloid Solution by Sophia Genetics<br>(customized) | Oncomine Myeloid Research Assay by<br>Thermo Fisher Scientific |
|-----------------------------------------------------|----------------------------------------------------------------|
| 32 genes                                            | 40 genes                                                       |
| <i>ABL1</i> (exons 4-9)                             | <i>ABL1</i> (hotspot regions)                                  |
| <b><i>ASXL1</i></b> (exons 9, 11, and 12)           | <b><i>ASXL1</i></b> (complete)                                 |
| <i>BRAF</i> (exon 15)                               | <b><i>BCOR</i></b> (complete)                                  |
| <i>CALR</i> (exon 9)                                | <i>BRAF</i> (hotspot regions)                                  |
| <b><i>CBL</i></b> (exons 8 and 9)                   | <i>CALR</i> (complete)                                         |
| <i>CEBPA</i> (complete)                             | <b><i>CBL</i></b> (hotspot regions)                            |
| <i>CSF3R</i> (complete)                             | <i>CEBPA</i> (complete)                                        |
| <i>CSNK1A1</i> (exons 3 and 4)                      | <i>CSF3R</i> (hotspot regions)                                 |
| <i>DNMT3A</i> (complete)                            | <i>DNMT3A</i> (hotspot regions)                                |
| <i>ETV6</i> (complete)                              | <i>ETV6</i> (complete)                                         |
| <b><i>EZH2</i></b> (complete)                       | <b><i>EZH2</i></b> (complete)                                  |
| <i>FLT3</i> (exons 13, 15 and 20)                   | <i>FLT3</i> (hotspot regions)                                  |
| <i>HRAS</i> (exons 2 and 3)                         | <b><i>GATA2</i></b> (hotspot regions)                          |
| <b><i>IDH1</i></b> (exon 4)                         | <i>HRAS</i> (hotspot regions)                                  |
| <b><i>IDH2</i></b> (exon 4)                         | <b><i>IDH1</i></b> (hotspot regions)                           |
| <i>JAK2</i> (complete)                              | <b><i>IDH2</i></b> (hotspot regions)                           |
| <i>KIT</i> (exons 2, 8-11, 13, 17 and 18)           | <b><i>IKZF1</i></b> (complete)                                 |
| <b><i>KMT2A</i></b> (exons 1-9 and 27)              | <i>JAK2</i> (hotspot regions)                                  |
| <b><i>KRAS</i></b> (exons 2 and 3)                  | <i>KIT</i> (hotspot regions)                                   |
| <i>MPL</i> (complete)                               | <b><i>KRAS</i></b> (hotspot regions)                           |
| <i>NPM1</i> (exons 10 and 11)                       | <i>MPL</i> (hotspot regions)                                   |
| <b><i>NRAS</i></b> (exons 2 and 3)                  | <b><i>MYD88</i></b> (hotspot regions)                          |
| <i>PTPN11</i> (exons 3, 7-13)                       | <b><i>NF1</i></b> (complete)                                   |
| <b><i>RUNX1</i></b> (complete)                      | <i>NPM1</i> (hotspot regions)                                  |
| <i>SETBP1</i> (exon 4)                              | <b><i>NRAS</i></b> (hotspot regions)                           |
| <i>SF3B1</i> (exons 14-16)                          | <b><i>PHF6</i></b> (complete)                                  |
| <b><i>SRSF2</i></b> (exon 1)                        | <b><i>PRPF8</i></b> (complete)                                 |
| <i>TET2</i> (complete)                              | <i>PTPN11</i> (hotspot regions)                                |
| <i>TP53</i> (complete)                              | <b><i>RB1</i></b> (complete)                                   |
| <b><i>U2AF1</i></b> (exons 2 and 6)                 | <b><i>RUNX1</i></b> (complete)                                 |
| <i>WT1</i> (exons 6 and 10)                         | <i>SETBP1</i> (hotspot regions)                                |
| <b><i>ZRSR2</i></b> (complete)                      | <i>SF3B1</i> (hotspot regions)                                 |
|                                                     | <b><i>SH2B3</i></b> (complete)                                 |
|                                                     | <b><i>SRSF2</i></b> (hotspot regions)                          |
|                                                     | <b><i>STAG2</i></b> (complete)                                 |
|                                                     | <i>TET2</i> (complete)                                         |
|                                                     | <i>TP53</i> (complete)                                         |
|                                                     | <b><i>U2AF1</i></b> (hotspot regions)                          |
|                                                     | <i>WT1</i> (hotspot regions)                                   |
|                                                     | <b><i>ZRSR2</i></b> (complete)                                 |

Analyzed genes that are different in each panel can be found in bold.

Chromatin/splicing genes that are diagnostic of chromatin/splicing mutation category can be found in green. Genes that are not covered by the panels we used but are part of the genomic classification by Grinfeld et al are: *PHF6* (only missing in the 32-gene panel), *CUX1* (missing in

both panels), *GNAS* (missing in both panels), *STAG2* (missing in the 32-gene panel), *BCOR* (missing in the 32-gene panel).

**Supplemental Figure S1: Distribution of patients in each molecular category according to risk stratification**

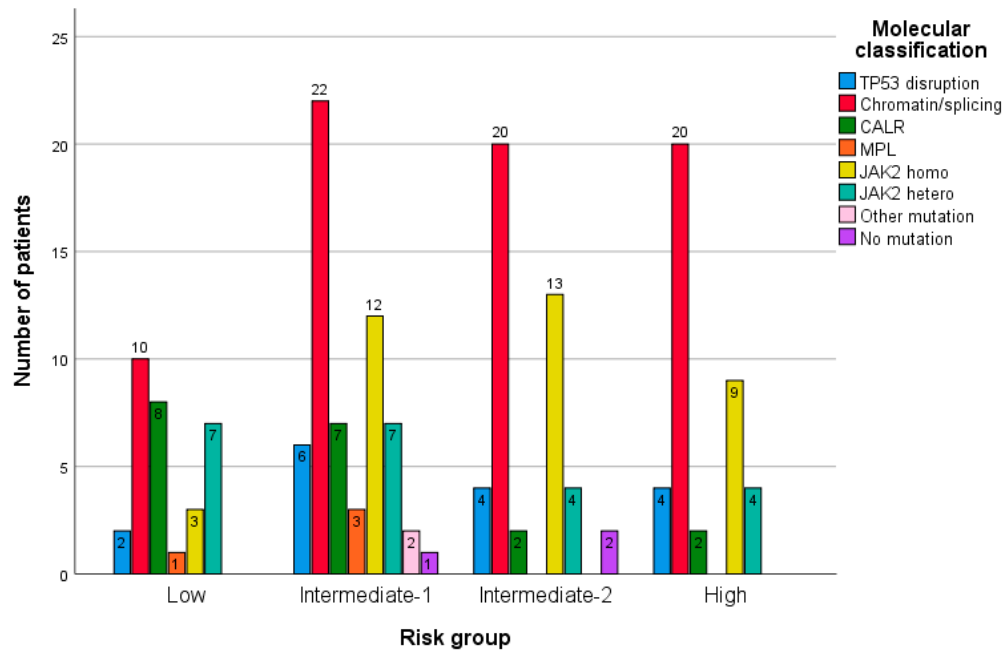

Risk stratification was performed by using IPSS or MySEC for primary and secondary myelofibrosis, respectively. Genomic classification was performed as described by Grinfeld. MF with *CALR* mutation, MF with *MPL* mutation, MF with heterozygous *JAK2* mutation, and MF with other mutation were classified predominantly in lower risk groups (p not significant for the overall comparison and p=0.002 when high risk genomic groups were pooled together). High risk genomic group included MF with *TP53* disruption/aneuploidy, MF with chromatin/spliceosome mutations, and MF with *JAK2* homozygous mutation.

**Supplemental Table S3: Pathogenic and likely pathogenic variants found in the analysis,**  
including allele frequency, manual categorization of the variant and the panel used

The following table shows variants found with NGS analysis that, after manual revision, were considered pathogenic or likely pathogenic and, therefore, taken into account for case classification. Allele frequency is noted in all cases.

Coverage was reviewed for every variant found but not collected systematically during variant notation. However, coverage requirement for considering the variant valid were:

- At least 100 reads in the position where the variant was located, with equilibrated reads in both directions of sequencing (a similar number of reads in both directions). Pathogenic and likely pathogenic variants needed to have an allele frequency of minimum 1% and 30 reads, with equilibrated reads in both directions of sequencing.
- Our quality standards are at least a mean coverage of x500, and ideally over x1000. With a >95% uniformity and on-target sequencing >95%.

| Gene         | cDNA            | Protein             | VAF   | Pathogenicity     | Panel used       | Coverage |
|--------------|-----------------|---------------------|-------|-------------------|------------------|----------|
| <b>ASXL1</b> | c.1851_1854dup  | p.(Ala619*)         | 44.6  | Pathogenic        | Myeloid Solution |          |
| <b>ASXL1</b> | c.2076_2079del  | p.(Arg693Hisfs*9)   | 15.5  | Likely pathogenic | Myeloid Solution |          |
| <b>ASXL1</b> | c.1281dupA      | p.(Gln428Thrfs*10)  | 41.9  | Likely pathogenic | Myeloid Solution |          |
| <b>ASXL1</b> | c.1549C>T       | p.(Gln517*)         | 13.6  | Pathogenic        | Myeloid Solution |          |
| <b>ASXL1</b> | c.2278C>T       | p.(Gln760*)         | 41.4  | Pathogenic        | Myeloid Solution |          |
| <b>ASXL1</b> | c.1900_1922del  | p.(Glu635Arsfs*15)  | 4.0   | Pathogenic        | Myeloid Solution |          |
| <b>ASXL1</b> | c.1934dupG      | p.(Gly646Trpfs*12)  | 39.3  | Pathogenic        | Myeloid Solution |          |
| <b>ASXL1</b> | c.1934dup       | p.(Gly646Trpfs*12)  | 40.0  | Pathogenic        | Myeloid Solution |          |
| <b>ASXL1</b> | c.2292_2273insA | p.(Leu765ThrfsTer9) | 32.2  | Pathogenic        | Myeloid Solution |          |
| <b>ASXL1</b> | c.2597T>G       | p.(Leu866*)         | 13.1  | Likely pathogenic | Myeloid Solution |          |
| <b>ASXL1</b> | c.1772dupA      | p.(Tyr591*)         | 3.8   | Pathogenic        | Myeloid Solution |          |
| <b>ASXL1</b> | c.1773_1776del  | p.(Tyr591*)         | 43.6  | Likely pathogenic | Myeloid Solution |          |
| <b>ASXL1</b> | c.3217C>T       | p.Arg1073Cys        | 50.08 | Likely Pathogenic | Oncomine         |          |
| <b>ASXL1</b> | c.2077C>T       | p.Arg693Ter         | 27.74 | Pathogenic        | Oncomine         | 1861     |
| <b>ASXL1</b> | c.2077C>T       | p.Arg693Ter         | 9.75  | Likely Pathogenic | Oncomine         |          |
| <b>ASXL1</b> | c.2278C>T       | p.Gln760Ter         | 41.43 | Pathogenic        | Oncomine         | 1233     |

|              |                                                                          |                    |       |                   |                  |       |
|--------------|--------------------------------------------------------------------------|--------------------|-------|-------------------|------------------|-------|
| <b>ASXL1</b> | c.2332C>T                                                                | p.Gln778Ter        | 53.33 | Likely Pathogenic | Oncomine         |       |
| <b>ASXL1</b> | c.1902_1924de<br>IAGAGGCGGCC<br>ACCACTGCCAT<br>CG                        | p.Glu635ArgfsTer15 | 15.58 | Pathogenic        | Oncomine         |       |
| <b>ASXL1</b> | c.1900_1922de<br>IAGAGAGGCGG<br>CCACCACTGCC<br>AT                        | p.Glu635ArgfsTer15 | 28.40 | Pathogenic        | Oncomine         | 720.6 |
| <b>ASXL1</b> | c.1758_1759ins<br>A                                                      | p.Gly587ArgfsTer32 | 16.92 | Pathogenic        | Oncomine         | 791.5 |
| <b>ASXL1</b> | c.1889_1910de<br>IACCACTGCCAT<br>AGAGAGGCGG<br>C                         | p.His630ProfsTer66 | 22.29 | Pathogenic        | Oncomine         | 720.6 |
| <b>ASXL1</b> | c.2161delC                                                               | p.Leu721fs         | 20.40 | Pathogenic        | Oncomine         |       |
| <b>ASXL1</b> | c.2292_2293ins<br>A                                                      | p.Leu765ThrfsTer9  | 32.18 | Pathogenic        | Oncomine         |       |
| <b>ASXL1</b> | c.2066C>G                                                                | p.Ser689Ter        | 4.94  | Pathogenic        | Oncomine         |       |
| <b>ASXL1</b> | c.2693G>A                                                                | p.Trp898Ter        | 14.79 | Pathogenic        | Oncomine         |       |
| <b>CALR</b>  | c.1091_1142del                                                           | p.(Gly364Glyfs*)   | 47.0  | Pathogenic        | Myeloid Solution |       |
| <b>CALR</b>  | c.1099_1150del                                                           | p.(Leu367Thrfs*)   | 41.0  | Pathogenic        | Myeloid Solution |       |
| <b>CALR</b>  | c.1099_1150del                                                           | p.(Leu367Thrfs*)   | 43.0  | Pathogenic        | Myeloid Solution |       |
| <b>CALR</b>  | c.1099_1150del                                                           | p.(Leu367Thrfs*)   | 44.0  | Pathogenic        | Myeloid Solution |       |
| <b>CALR</b>  | c.1099_1150del                                                           | p.(Leu367Thrfs*)   | 45.0  | Pathogenic        | Myeloid Solution |       |
| <b>CALR</b>  | c.1103_1148del                                                           | p.(Lys368Argfs*)   | 36.0  | Pathogenic        | Myeloid Solution |       |
| <b>CALR</b>  | c.1154_1155ins<br>TTGTC                                                  | p.(Lys385Asnfs*)   | 31.7  | Pathogenic        | Myeloid Solution |       |
| <b>CALR</b>  | c.1154_1155ins<br>TTGTC                                                  | p.(Lys385Asnfs*)   | 49.8  | Pathogenic        | Myeloid Solution |       |
| <b>CALR</b>  | c.1117_1118del<br>IGAinsTT                                               | p.Asp373Phe        | 44.45 | Pathogenic        | Oncomine         |       |
| <b>CALR</b>  | c.1139_1140del<br>IAGinsTT                                               | p.Glu380Val        | 44.54 | Pathogenic        | Oncomine         |       |
| <b>CALR</b>  | c.1154_1155ins<br>ATGTC                                                  | p.Glu386fs         | 78.74 | Pathogenic        | Oncomine         |       |
| <b>CALR</b>  | c.1099_1150del<br>ICTTAAGGAGG<br>AGGAAGAAGA<br>CAAGAAACGCA<br>AAGAGGAGGA | p.Leu367fs         | 27.57 | Pathogenic        | Oncomine         |       |

|             |                                                                                            |                        |       |            |          |      |
|-------------|--------------------------------------------------------------------------------------------|------------------------|-------|------------|----------|------|
|             | GGAGGCAGAG<br>G                                                                            |                        |       |            |          |      |
| <b>CALR</b> | c.1099_1150de<br>ICTTAAGGAGG<br>AGGAAGAAGA<br>CAAGAAACGCA<br>AAGAGGAGGA<br>GGAGGCAGAG<br>G | p.Leu367fs             | 29.88 | Pathogenic | Oncomine | 1087 |
| <b>CALR</b> | c.1099_1150de<br>ICTTAAGGAGG<br>AGGAAGAAGA<br>CAAGAAACGCA<br>AAGAGGAGGA<br>GGAGGCAGAG<br>G | p.Leu367fs             | 46.74 | Pathogenic | Oncomine |      |
| <b>CALR</b> | c.1099_1150de<br>ICTTAAGGAGG<br>AGGAAGAAGA<br>CAAGAAACGCA<br>AAGAGGAGGA<br>GGAGGCAGAG<br>G | p.Leu367ThrfsT<br>er46 | 53.00 | Pathogenic | Oncomine |      |
| <b>CALR</b> | c.1099_1150de<br>ICTTAAGGAGG<br>AGGAAGAAGA<br>CAAGAAACGCA<br>AAGAGGAGGA<br>GGAGGCAGAG<br>G | p.Leu367ThrfsT<br>er46 | 42.79 | Pathogenic | Oncomine |      |
| <b>CALR</b> | c.1099_1150de<br>ICTTAAGGAGG<br>AGGAAGAAGA<br>CAAGAAACGCA<br>AAGAGGAGGA<br>GGAGGCAGAG<br>G | p.Leu367ThrfsT<br>er46 | 44.64 | Pathogenic | Oncomine |      |
| <b>CALR</b> | c.1099_1150de<br>ICTTAAGGAGG<br>AGGAAGAAGA<br>CAAGAAACGCA<br>AAGAGGAGGA<br>GGAGGCAGAG<br>G | p.Leu367ThrfsT<br>er46 | 46.31 | Pathogenic | Oncomine |      |
| <b>CALR</b> | c.1099_1150de<br>ICTTAAGGAGG<br>AGGAAGAAGA<br>CAAGAAACGCA<br>AAGAGGAGGA<br>GGAGGCAGAG<br>G | p.Leu367ThrfsT<br>er46 | 47.13 | Pathogenic | Oncomine |      |
| <b>CALR</b> | c.1099_1150de<br>ICTTAAGGAGG<br>AGGAAGAAGA<br>CAAGAAACGCA<br>AAGAGGAGGA<br>GGAGGCAGAG<br>G | p.Leu367ThrfsT<br>er46 | 47.82 | Pathogenic | Oncomine |      |

|               |                                                                                            |                    |       |                   |                  |       |
|---------------|--------------------------------------------------------------------------------------------|--------------------|-------|-------------------|------------------|-------|
| <b>CALR</b>   | c.1099_1150de<br>ICTTAAGGAGG<br>AGGAAGAAGA<br>CAAGAAACGCA<br>AAGAGGAGGA<br>GGAGGCAGAG<br>G | p.Leu367ThrfsTer46 | 48.22 | Pathogenic        | Oncomine         |       |
| <b>CALR</b>   | c.1099_1150de<br>ICTTAAGGAGG<br>AGGAAGAAGA<br>CAAGAAACGCA<br>AAGAGGAGGA<br>GGAGGCAGAG<br>G | p.Leu367ThrfsTer46 | 53    | Pathogenic        | Oncomine         |       |
| <b>CALR</b>   | c.1154_1155ins<br>TTGTC                                                                    | p.Lys385AsnfsTer47 | 38.44 | Pathogenic        | Oncomine         |       |
| <b>CALR</b>   | c.1154_1155ins<br>TTGTC                                                                    | p.Lys385AsnfsTer47 | 38.55 | Pathogenic        | Oncomine         | 720.6 |
| <b>CALR</b>   | c.1154_1155ins<br>TTGTC                                                                    | p.Lys385AsnfsTer47 | 62.24 | Pathogenic        | Oncomine         |       |
| <b>CALR</b>   | c.1154_1155ins<br>TTGTC                                                                    | p.Lys385AsnfsTer47 | 80.36 | Pathogenic        | Oncomine         | 1861  |
| <b>CALR</b>   | c.1154_1155ins<br>TTGTC                                                                    | p.Lys385fs         | 11.76 | Pathogenic        | Oncomine         |       |
| <b>CALR</b>   | c.1154_1155ins<br>TTGTC                                                                    | p.Lys385fs         | 5.80  | Pathogenic        | Oncomine         |       |
| <b>CBL</b>    | c.1259G>A                                                                                  | p.(Arg420Gln)      | 9.2   | Pathogenic        | Myeloid Solution |       |
| <b>CBL</b>    | C.1111T>G                                                                                  | P.(Tyr371Asp)      | 21.1  | Likely pathogenic | Myeloid Solution |       |
| <b>CBL</b>    | c.1211G>T                                                                                  | p.Cys404Phe        | 13.87 | Likely pathogenic | Oncomine         |       |
| <b>CBL</b>    | c.1111T>G                                                                                  | p.Tyr371Asp        | 21.09 | Likely Pathogenic | Oncomine         | 893.1 |
| <b>CBL</b>    | c.1111T>C                                                                                  | p.Tyr371His        | 51.41 | Pathogenic        | Oncomine         |       |
| <b>DNMT3A</b> | c.1364_1370dup                                                                             | p.(Arg458Lysfs*17) | 39.7  | Likely pathogenic | Myeloid Solution |       |
| <b>DNMT3A</b> | c.2645G>C                                                                                  | p.(Arg882Pro)      | 41.9  | Likely pathogenic | Myeloid Solution |       |
| <b>DNMT3A</b> | c.1792C>T                                                                                  | p.Arg598Ter        | 7.64  | Likely pathogenic | Oncomine         | 721.2 |
| <b>DNMT3A</b> | c.2207G>A                                                                                  | p.Arg736His        | 4.20  | Likely pathogenic | Oncomine         | 721.2 |
| <b>DNMT3A</b> | c.2644C>T                                                                                  | p.Arg882Cys        | 43.46 | Pathogenic        | Oncomine         |       |
| <b>DNMT3A</b> | c.2389A>T                                                                                  | p.Asn797Tyr        | 6.84  | Likely pathogenic | Oncomine         | 632.4 |
| <b>DNMT3A</b> | c.1718_1718de<br>lAinsCAACTG                                                               | p.Gln573ProfsTer80 | 10.01 | Likely pathogenic | Oncomine         |       |



|               |                     |                    |       |                   |                  |       |
|---------------|---------------------|--------------------|-------|-------------------|------------------|-------|
| <b>DNMT3A</b> | c.2030A>T           | p.His677Leu        | 47.14 | Likely pathogenic | Oncomine         |       |
| <b>DNMT3A</b> | c.1640T>C           | p.Leu547Pro        | 1.60  | Likely pathogenic | Oncomine         | 773.5 |
| <b>EZH2</b>   | c.836_837del        | p.(His279Leufs*8)  | 16.3  | Likely pathogenic | Myeloid Solution |       |
| <b>EZH2</b>   | c.625+1G>T          | p.?                | 23.93 | Pathogenic        | Oncomine         |       |
| <b>EZH2</b>   | c.625+1G>T          | p.?                | 45.93 | Pathogenic        | Oncomine         |       |
| <b>EZH2</b>   | c.763G>A            | p.Ala255Thr        | 38.12 | Likely pathogenic | Oncomine         |       |
| <b>EZH2</b>   | c.2051G>A           | p.Arg684His        | 31.27 | Likely pathogenic | Oncomine         | 691.4 |
| <b>EZH2</b>   | c.2051G>T           | p.Arg684Leu        | 93.56 | Likely pathogenic | Oncomine         |       |
| <b>EZH2</b>   | c.1733delG          | p.Cys578SerfsTer97 | 19.89 | Likely pathogenic | Oncomine         | 1233  |
| <b>EZH2</b>   | c.475G>A            | p.Gly159Arg        | 20.70 | Pathogenic        | Oncomine         | 720.6 |
| <b>EZH2</b>   | c.446T>G            | p.Leu149Arg        | 6.11  | Likely pathogenic | Oncomine         |       |
| <b>EZH2</b>   | c.833T>G            | p.Leu278Ter        | 27.17 | Pathogenic        | Oncomine         |       |
| <b>EZH2</b>   | c.1312_1316delAGTGG | p.Ser438CysfsTer2  | 2.09  | Likely pathogenic | Oncomine         |       |
| <b>EZH2</b>   | c.2084C>T           | p.Ser695Leu        | 4.63  | Likely pathogenic | Oncomine         |       |
| <b>IDH1</b>   | c.395G>A            | p.(Arg132His)      | 50.0  | Pathogenic        | Myeloid Solution |       |
| <b>IDH2</b>   | c.419G>A            | p.(Arg140Gln)      | 3.2   | Pathogenic        | Myeloid Solution |       |
| <b>IDH2</b>   | c.419G>A            | p.(Arg140Gln)      | 46.7  | Pathogenic        | Myeloid Solution |       |
| <b>IDH2</b>   | c.419G>A            | p.Arg140Gln        | 36.55 | Pathogenic        | Oncomine         |       |
| <b>JAK2</b>   | c.1849G>T           | p.(Val617Phe)      | 3.0   | Pathogenic        | Myeloid Solution |       |
| <b>JAK2</b>   | c.1849G>T           | p.(Val617Phe)      | 6.2   | Pathogenic        | Myeloid Solution |       |
| <b>JAK2</b>   | c.1849G>T           | p.(Val617Phe)      | 9.1   | Pathogenic        | Myeloid Solution |       |
| <b>JAK2</b>   | c.1849G>T           | p.(Val617Phe)      | 11    | Pathogenic        | Myeloid Solution |       |
| <b>JAK2</b>   | c.1849G>T           | p.(Val617Phe)      | 15.4  | Pathogenic        | Myeloid Solution |       |
| <b>JAK2</b>   | c.1849G>T           | p.(Val617Phe)      | 16.4  | Pathogenic        | Myeloid Solution |       |
| <b>JAK2</b>   | c.1849G>T           | p.(Val617Phe)      | 20.9  | Pathogenic        | Myeloid Solution |       |

|             |           |               |      |            |                  |  |
|-------------|-----------|---------------|------|------------|------------------|--|
| <b>JAK2</b> | c.1849G>T | p.(Val617Phe) | 26.0 | Pathogenic | Oncomine         |  |
| <b>JAK2</b> | c.1849G>T | p.(Val617Phe) | 26.4 | Pathogenic | Myeloid Solution |  |
| <b>JAK2</b> | c.1849G>T | p.(Val617Phe) | 30.1 | Pathogenic | Myeloid Solution |  |
| <b>JAK2</b> | c.1849G>T | p.(Val617Phe) | 30.9 | Pathogenic | Myeloid Solution |  |
| <b>JAK2</b> | c.1849G>T | p.(Val617Phe) | 31.0 | Pathogenic | Myeloid Solution |  |
| <b>JAK2</b> | c.1849G>T | p.(Val617Phe) | 36.4 | Pathogenic | Myeloid Solution |  |
| <b>JAK2</b> | c.1849G>T | p.(Val617Phe) | 39.8 | Pathogenic | Myeloid Solution |  |
| <b>JAK2</b> | c.1849G>T | p.(Val617Phe) | 40.6 | Pathogenic | Myeloid Solution |  |
| <b>JAK2</b> | c.1849G>T | p.(Val617Phe) | 41.1 | Pathogenic | Oncomine         |  |
| <b>JAK2</b> | c.1849G>T | p.(Val617Phe) | 42.3 | Pathogenic | Myeloid Solution |  |
| <b>JAK2</b> | c.1849G>T | p.(Val617Phe) | 42.6 | Pathogenic | Oncomine         |  |
| <b>JAK2</b> | c.1849G>T | p.(Val617Phe) | 43.0 | Pathogenic | Myeloid Solution |  |
| <b>JAK2</b> | c.1849G>T | p.(Val617Phe) | 44.2 | Pathogenic | Myeloid Solution |  |
| <b>JAK2</b> | c.1849G>T | p.(Val617Phe) | 45.2 | Pathogenic | Myeloid Solution |  |
| <b>JAK2</b> | c.1849G>T | p.(Val617Phe) | 46.5 | Pathogenic | Myeloid Solution |  |
| <b>JAK2</b> | c.1849G>T | p.(Val617Phe) | 47.3 | Pathogenic | Myeloid Solution |  |
| <b>JAK2</b> | c.1849G>T | p.(Val617Phe) | 48.1 | Pathogenic | Myeloid Solution |  |
| <b>JAK2</b> | c.1849G>T | p.(Val617Phe) | 48.4 | Pathogenic | Myeloid Solution |  |
| <b>JAK2</b> | c.1849G>T | p.(Val617Phe) | 53.6 | Pathogenic | Myeloid Solution |  |
| <b>JAK2</b> | c.1849G>T | p.(Val617Phe) | 54.2 | Pathogenic | Myeloid Solution |  |
| <b>JAK2</b> | c.1849G>T | p.(Val617Phe) | 55.9 | Pathogenic | Myeloid Solution |  |
| <b>JAK2</b> | c.1849G>T | p.(Val617Phe) | 56.6 | Pathogenic | Oncomine         |  |
| <b>JAK2</b> | c.1849G>T | p.(Val617Phe) | 57.8 | Pathogenic | Myeloid Solution |  |
| <b>JAK2</b> | c.1849G>T | p.(Val617Phe) | 67.3 | Pathogenic | Myeloid Solution |  |
| <b>JAK2</b> | c.1849G>T | p.(Val617Phe) | 68.2 | Pathogenic | Myeloid Solution |  |

|             |           |               |       |            |                  |       |
|-------------|-----------|---------------|-------|------------|------------------|-------|
| <b>JAK2</b> | c.1849G>T | p.(Val617Phe) | 71.5  | Pathogenic | Myeloid Solution |       |
| <b>JAK2</b> | c.1849G>T | p.(Val617Phe) | 77.1  | Pathogenic | Oncomine         |       |
| <b>JAK2</b> | c.1849G>T | p.(Val617Phe) | 81.4  | Pathogenic | Myeloid Solution |       |
| <b>JAK2</b> | c.1849G>T | p.(Val617Phe) | 84.0  | Pathogenic | Myeloid Solution |       |
| <b>JAK2</b> | c.1849G>T | p.(Val617Phe) | 88.9  | Pathogenic | Myeloid Solution |       |
| <b>JAK2</b> | c.1849G>T | p.(Val617Phe) | 89.3  | Pathogenic | Myeloid Solution |       |
| <b>JAK2</b> | c.1849G>T | p.(Val617Phe) | 89.7  | Pathogenic | Myeloid Solution |       |
| <b>JAK2</b> | c.1849G>T | p.(Val617Phe) | 92.1  | Pathogenic | Myeloid Solution |       |
| <b>JAK2</b> | c.1849G>T | p.(Val617Phe) | 92.4  | Pathogenic | Myeloid Solution |       |
| <b>JAK2</b> | c.1849G>T | p.(Val617Phe) | 92.6  | Pathogenic | Myeloid Solution |       |
| <b>JAK2</b> | c.1849G>T | p.(Val617Phe) | 96.2  | Pathogenic | Myeloid Solution |       |
| <b>JAK2</b> | c.1849G>T | p.(Val617Phe) | 97.9  | Pathogenic | Myeloid Solution |       |
| <b>JAK2</b> | c.1849G>T | p.(Val617Phe) | 97.9  | Pathogenic | Myeloid Solution |       |
| <b>JAK2</b> | c.1849G>T | p.(Val617Phe) | 99.7  | Pathogenic | Myeloid Solution |       |
| <b>JAK2</b> | c.1849G>T | p.Val617Phe   | 17.9  | Pathogenic | Oncomine         |       |
| <b>JAK2</b> | c.1849G>T | p.Val617Phe   | 55.8  | Pathogenic | Oncomine         |       |
| <b>JAK2</b> | c.1849G>T | p.Val617Phe   | 72.7  | Pathogenic | Oncomine         |       |
| <b>JAK2</b> | c.1849G>T | p.Val617Phe   | 10.41 | Pathogenic | Oncomine         | 1113  |
| <b>JAK2</b> | c.1849G>T | p.Val617Phe   | 16.08 | Pathogenic | Oncomine         | 903.2 |
| <b>JAK2</b> | c.1849G>T | p.Val617Phe   | 2.83  | Pathogenic | Oncomine         |       |
| <b>JAK2</b> | c.1849G>T | p.Val617Phe   | 20.91 | Pathogenic | Oncomine         |       |
| <b>JAK2</b> | c.1849G>T | p.Val617Phe   | 27.82 | Pathogenic | Oncomine         |       |
| <b>JAK2</b> | c.1849G>T | p.Val617Phe   | 29.91 | Pathogenic | Oncomine         |       |
| <b>JAK2</b> | c.1849G>T | p.Val617Phe   | 3.82  | Pathogenic | Oncomine         | 834.8 |
| <b>JAK2</b> | c.1849G>T | p.Val617Phe   | 3.88  | Pathogenic | Oncomine         | 721.2 |
| <b>JAK2</b> | c.1849G>T | p.Val617Phe   | 32.78 | Pathogenic | Oncomine         | 701.1 |
| <b>JAK2</b> | c.1849G>T | p.Val617Phe   | 34.45 | Pathogenic | Oncomine         |       |
| <b>JAK2</b> | c.1849G>T | p.Val617Phe   | 38.61 | Pathogenic | Oncomine         |       |
| <b>JAK2</b> | c.1849G>T | p.Val617Phe   | 39.37 | Pathogenic | Oncomine         | 1206  |

|             |           |               |       |                   |                  |       |
|-------------|-----------|---------------|-------|-------------------|------------------|-------|
| <b>JAK2</b> | c.1849G>T | p.Val617Phe   | 39.82 | Pathogenic        | Oncomine         |       |
| <b>JAK2</b> | c.1849G>T | p.Val617Phe   | 4.10  | Pathogenic        | Oncomine         | 632.4 |
| <b>JAK2</b> | c.1849G>T | p.Val617Phe   | 4.40  | Pathogenic        | Oncomine         | 770.5 |
| <b>JAK2</b> | c.1849G>T | p.Val617Phe   | 40.59 | Pathogenic        | Oncomine         |       |
| <b>JAK2</b> | c.1849G>T | p.Val617Phe   | 41.07 | Pathogenic        | Oncomine         |       |
| <b>JAK2</b> | c.1849G>T | p.Val617Phe   | 42.50 | Pathogenic        | Oncomine         |       |
| <b>JAK2</b> | c.1849G>T | p.Val617Phe   | 43.55 | Pathogenic        | Oncomine         |       |
| <b>JAK2</b> | c.1849G>T | p.Val617Phe   | 44.18 | Pathogenic        | Oncomine         | 917.8 |
| <b>JAK2</b> | c.1849G>T | p.Val617Phe   | 45.05 | Pathogenic        | Oncomine         |       |
| <b>JAK2</b> | c.1849G>T | p.Val617Phe   | 46.09 | Pathogenic        | Oncomine         | 963.4 |
| <b>JAK2</b> | c.1849G>T | p.Val617Phe   | 46.50 | Pathogenic        | Oncomine         |       |
| <b>JAK2</b> | c.1849G>T | p.Val617Phe   | 47.31 | Pathogenic        | Oncomine         |       |
| <b>JAK2</b> | c.1849G>T | p.Val617Phe   | 5.31  | Pathogenic        | Oncomine         | 780.4 |
| <b>JAK2</b> | c.1849G>T | p.Val617Phe   | 52.50 | Pathogenic        | Oncomine         |       |
| <b>JAK2</b> | c.1849G>T | p.Val617Phe   | 52.92 | Pathogenic        | Oncomine         | 1031  |
| <b>JAK2</b> | c.1849G>T | p.Val617Phe   | 6.32  | Pathogenic        | Oncomine         | 773.5 |
| <b>JAK2</b> | c.1849G>T | p.Val617Phe   | 62.60 | Pathogenic        | Oncomine         |       |
| <b>JAK2</b> | c.1849G>T | p.Val617Phe   | 64.11 | Pathogenic        | Oncomine         | 1048  |
| <b>JAK2</b> | c.1849G>T | p.Val617Phe   | 65.06 | Pathogenic        | Oncomine         |       |
| <b>JAK2</b> | c.1849G>T | p.Val617Phe   | 66.72 | Pathogenic        | Oncomine         | 1043  |
| <b>JAK2</b> | c.1849G>T | p.Val617Phe   | 77.88 | Pathogenic        | Oncomine         | 1048  |
| <b>JAK2</b> | c.1849G>T | p.Val617Phe   | 78.37 | Pathogenic        | Oncomine         |       |
| <b>JAK2</b> | c.1849G>T | p.Val617Phe   | 78.82 | Pathogenic        | Oncomine         |       |
| <b>JAK2</b> | c.1849G>T | p.Val617Phe   | 80.30 | Pathogenic        | Oncomine         | 1084  |
| <b>JAK2</b> | c.1849G>T | p.Val617Phe   | 81.41 | Pathogenic        | Oncomine         |       |
| <b>JAK2</b> | c.1849G>T | p.Val617Phe   | 87.21 | Pathogenic        | Oncomine         | 950   |
| <b>JAK2</b> | c.1849G>T | p.Val617Phe   | 87.25 | Pathogenic        | Oncomine         | 876.6 |
| <b>JAK2</b> | c.1849G>T | p.Val617Phe   | 90.12 | Pathogenic        | Oncomine         |       |
| <b>JAK2</b> | c.1849G>T | p.Val617Phe   | 92.15 | Pathogenic        | Oncomine         |       |
| <b>JAK2</b> | c.1849G>T | p.Val617Phe   | 92.36 | Pathogenic        | Oncomine         |       |
| <b>JAK2</b> | c.1849G>T | p.Val617Phe   | 94.46 | Pathogenic        | Oncomine         |       |
| <b>JAK2</b> | c.1849G>T | p.Val617Phe   | 94.59 | Pathogenic        | Oncomine         |       |
| <b>JAK2</b> | c.1849G>T | p.Val617Phe   | 97.89 | Pathogenic        | Oncomine         |       |
| <b>KRAS</b> | c.437C>T  | p.(Ala146Val) | 34.4  | Pathogenic        | Myeloid Solution |       |
| <b>KRAS</b> | c.176C>G  | p.(Ala59Gly)  | 12.1  | Likely pathogenic | Myeloid Solution |       |

|               |                        |                   |       |                   |                  |       |
|---------------|------------------------|-------------------|-------|-------------------|------------------|-------|
| <b>KRAS</b>   | c.57G>C                | p.(Leu19Phe)      | 5.2   | Likely pathogenic | Myeloid Solution |       |
| <b>KRAS</b>   | c.70A>C                | p.Ile24Leu        | 5.21  | Pathogenic        | Oncomine         | 1233  |
| <b>KRAS</b>   | c.57G>C                | p.Leu19Phe        | 5.20  | Pathogenic        | Oncomine         | 1233  |
| <b>MPL</b>    | c.1544G>T              | p.Trp515Leu       | 50.24 | Pathogenic        | Oncomine         |       |
| <b>MPL</b>    | c.1544G>T              | p.Trp515Leu       | 66.44 | Pathogenic        | Oncomine         |       |
| <b>MPL</b>    | c.1543_1544delITGinsAA | p.Trp515Lys       | 54.38 | Pathogenic        | Oncomine         | 893.1 |
| <b>MPL</b>    | c.1895G>C              | p.Trp632Ser       | 23.09 | Pathogenic        | Oncomine         |       |
| <b>MPL</b>    | c.1771T>G              | p.Tyr591Asp       | 1.63  | Likely pathogenic | Oncomine         | 1031  |
| <b>MPL</b>    | c.1771T>G              | p.Tyr591Asp       | 46.66 | Likely pathogenic | Oncomine         | 701.1 |
| <b>MPL</b>    | c.1771T>G              | p.Tyr591Asp       | 58.45 | Likely pathogenic | Oncomine         |       |
| <b>NRAS</b>   | c.175G>A               | p.Ala59Thr        | 9.68  | Pathogenic        | Oncomine         | 1441  |
| <b>PTPN11</b> | c.1471C>T              | p.Pro491Ser       | 44.92 | Likely pathogenic | Oncomine         |       |
| <b>PTPN11</b> | c.1504T>C              | p.Ser502Pro       | 29.39 | Pathogenic        | Oncomine         |       |
| <b>RUNX1</b>  | c.511G>A               | p.(Asp171Asn)     | 3.7   | Likely pathogenic | Myeloid Solution |       |
| <b>RUNX1</b>  | c.1308del              | p.(Thr437Profs*?) | 4.0   | Likely pathogenic | Myeloid Solution |       |
| <b>RUNX1</b>  | c.508+2T>C             | p.?               | 5.16  | Likely pathogenic | Oncomine         | 950   |
| <b>SETBP1</b> | c.2602G>A              | p.(Asp868Asn)     | 13.1  | Pathogenic        | Myeloid Solution |       |
| <b>SETBP1</b> | c.2602G>A              | p.Asp868Asn       | 26.95 | Pathogenic        | Oncomine         |       |
| <b>SETBP1</b> | c.2602G>A              | p.Asp868Asn       | 49.89 | Pathogenic        | Oncomine         |       |
| <b>SETBP1</b> | c.2608G>A              | p.Gly870Ser       | 33.90 | Likely pathogenic | Oncomine         |       |
| <b>SF3B1</b>  | c.2098A>G              | p.(Lys700Glu)     | 44.9  | Pathogenic        | Myeloid Solution |       |
| <b>SF3B1</b>  | c.2242A>G              | p.(Lys748Glu)     | 32.7  | Likely pathogenic | Myeloid Solution |       |
| <b>SF3B1</b>  | c.1877A>G              | p.Asn626Ser       | 2.60  | Pathogenic        | Oncomine         | 876.6 |
| <b>SF3B1</b>  | c.1998G>C              | p.Lys666Asn       | 21.52 | Pathogenic        | Oncomine         |       |
| <b>SF3B1</b>  | c.1998G>T              | p.Lys666Asn       | 33.43 | Pathogenic        | Oncomine         | 1206  |
| <b>SF3B1</b>  | c.1998G>T              | p.Lys666Asn       | 36.43 | Pathogenic        | Oncomine         |       |
| <b>SF3B1</b>  | c.1997A>C              | p.Lys666Thr       | 42.43 | Pathogenic        | Oncomine         | 641.2 |
| <b>SRSF2</b>  | c.284C>G               | p.(Pro95Arg)      | 32.3  | Pathogenic        | Myeloid Solution |       |

|              |                      |                        |       |                   |                  |       |
|--------------|----------------------|------------------------|-------|-------------------|------------------|-------|
| <b>SRSF2</b> | c.284C>G             | p.(Pro95Arg)           | 40.9  | Pathogenic        | Myeloid Solution |       |
| <b>SRSF2</b> | c.284C>G             | p.(Pro95Arg)           | 49.5  | Pathogenic        | Myeloid Solution |       |
| <b>SRSF2</b> | c.284C>A             | p.(Pro95His)           | 39.3  | Likely pathogenic | Myeloid Solution |       |
| <b>SRSF2</b> | c.284C>A             | p.(Pro95His)           | 45.8  | Pathogenic        | Myeloid Solution |       |
| <b>SRSF2</b> | c.284C>A             | p.(Pro95His)           | 47.2  | Pathogenic        | Myeloid Solution |       |
| <b>SRSF2</b> | c.284C>T             | p.(Pro95Leu)           | 45.5  | Likely pathogenic | Myeloid Solution |       |
| <b>SRSF2</b> | c.284C>T             | p.(Pro95Leu)           | 46.4  | Likely pathogenic | Myeloid Solution |       |
| <b>SRSF2</b> | c.102C>A, c.-1294G>T | p.Phe34Leu, p.?        | 1.66  | likely pathogenic | Oncomine         | 1031  |
| <b>SRSF2</b> | c.283C>G             | p.Pro95Ala             | 2.27  | Pathogenic        | Oncomine         | 728.5 |
| <b>SRSF2</b> | c.283C>G             | p.Pro95Ala             | 42.55 | Pathogenic        | Oncomine         |       |
| <b>SRSF2</b> | c.284C>G             | p.Pro95Arg             | 44.19 | Likely pathogenic | Oncomine         |       |
| <b>SRSF2</b> | c.283C>G             | p.Pro95Arg, p.?        | 44.57 | Pathogenic        | Oncomine         |       |
| <b>SRSF2</b> | c.284C>A             | p.Pro95His             | 46.84 | Pathogenic        | Oncomine         |       |
| <b>SRSF2</b> | c.284C>A             | p.Pro95His             | 50.65 | Pathogenic        | Oncomine         | 1113  |
| <b>SRSF2</b> | c.284C>A, c.-1476G>T | p.Pro95His, p.?        | 48.10 | Pathogenic        | Oncomine         |       |
| <b>SRSF2</b> | c.284C>A, c.-1476G>T | p.Pro95His, p.?        | 57.25 | Pathogenic        | Oncomine         |       |
| <b>TET2</b>  | c.4546C>T            | p.(Arg1516*)           | 47.3  | Pathogenic        | Myeloid Solution |       |
| <b>TET2</b>  | c.5134A>T            | p.(Arg1712*)           | 4.0   | Likely pathogenic | Myeloid Solution |       |
| <b>TET2</b>  | c.436del             | p.(Asp146Ilefs*6)      | 34.1  | Likely pathogenic | Myeloid Solution |       |
| <b>TET2</b>  | c.483dup             | p.(Asp162Argfs*9)      | 3.9   | Pathogenic        | Myeloid Solution |       |
| <b>TET2</b>  | c.2200C>T            | p.(Gln734*)            | 45.3  | Likely pathogenic | Myeloid Solution |       |
| <b>TET2</b>  | c.2662C>T            | p.(Gln888*)            | 6.1   | Likely pathogenic | Myeloid Solution |       |
| <b>TET2</b>  | c.3718_3719del       | p.(Leu1240Glyfs*2)     | 2.3   | Likely pathogenic | Myeloid Solution |       |
| <b>TET2</b>  | c.4590_4604del       | p.(Leu1531_Pro1535del) | 47    | Likely pathogenic | Myeloid Solution |       |
| <b>TET2</b>  | c.3065delA           | p.(Lys1022ArgfsTer11)  | 49.2  | Pathogenic        | Myeloid Solution |       |

|             |                                         |                      |       |                   |                  |       |
|-------------|-----------------------------------------|----------------------|-------|-------------------|------------------|-------|
| <b>TET2</b> | c.875_876insT                           | p.(Ser293Glufs Ter2) | 16.4  | Likely pathogenic | Myeloid Solution |       |
| <b>TET2</b> | c.94_95insAGC TA                        | p.(Thr32LysTer 19)   | 41.9  | Likely pathogenic | Myeloid Solution |       |
| <b>TET2</b> | c.576C>G                                | p.(Tyr192*)          | 82.2  | Likely pathogenic | Myeloid Solution |       |
| <b>TET2</b> | c.3501-1G>A                             | p.?                  | 42.13 | Likely pathogenic | Oncomine         |       |
| <b>TET2</b> | c.4427delC                              | p.Ala1476Valfs Ter95 | 34.51 | Likely pathogenic | Oncomine         | 1600  |
| <b>TET2</b> | c.3646C>T                               | p.Arg1216Ter         | 49.20 | Likely pathogenic | Oncomine         |       |
| <b>TET2</b> | c.3782G>A                               | p.Arg1261His         | 1.42  | Likely pathogenic | Oncomine         |       |
| <b>TET2</b> | c.3784C>T                               | p.Arg1262Trp         | 6.33  | Likely pathogenic | Oncomine         | 917.8 |
| <b>TET2</b> | c.4062_4063de lAG                       | p.Arg1354Serfs Ter46 | 35.89 | Likely pathogenic | Oncomine         |       |
| <b>TET2</b> | c.4546C>T                               | p.Arg1516Ter         | 28.77 | Likely pathogenic | Oncomine         | 1113  |
| <b>TET2</b> | c.1648C>T                               | p.Arg550Ter          | 43.87 | Pathogenic        | Oncomine         | 950   |
| <b>TET2</b> | c.2256_2259de lTAAA                     | p.Asn752LysfsT er60  | 12.94 | Pathogenic        | Oncomine         | 1113  |
| <b>TET2</b> | c.3812_3813ins G                        | p.Cys1271fs          | 39.22 | Pathogenic        | Oncomine         |       |
| <b>TET2</b> | c.4042C>T                               | p.Gln1348Ter         | 38.03 | Likely pathogenic | Oncomine         | 876.6 |
| <b>TET2</b> | c.2305C>T                               | p.Gln769Ter          | 4.65  | Pathogenic        | Oncomine         |       |
| <b>TET2</b> | c.2428C>T                               | p.Gln810Ter          | 49.86 | Likely pathogenic | Oncomine         |       |
| <b>TET2</b> | c.2671C>T                               | p.Gln891Ter          | 72.51 | Likely pathogenic | Oncomine         | 933.4 |
| <b>TET2</b> | c.5263G>T                               | p.Glu1755Ter         | 43.92 | Likely pathogenic | Oncomine         |       |
| <b>TET2</b> | c.550_551delG AinsT                     | p.Glu184CysfsT er23  | 58.52 | Likely pathogenic | Oncomine         |       |
| <b>TET2</b> | c.4544delT                              | p.Leu1515Cysfs Ter56 | 43.83 | Pathogenic        | Oncomine         |       |
| <b>TET2</b> | c.4936_4937ins AGTGGACAACT GCTCCCATAT C | p.Leu1646fs          | 16.91 | Likely pathogenic | Oncomine         |       |
| <b>TET2</b> | c.3065delA                              | p.Lys1022Argfs Ter11 | 49.19 | Pathogenic        | Oncomine         | 917.8 |
| <b>TET2</b> | c.976A>T                                | p.Lys326Ter          | 1.90  | Likely pathogenic | Oncomine         | 1031  |

|              |                          |                            |       |                      |                     |       |
|--------------|--------------------------|----------------------------|-------|----------------------|---------------------|-------|
| <b>TET2</b>  | c.3854_3856de<br>ITCT    | p.Phe1285del               | 3.43  | Likely<br>pathogenic | Oncomine            |       |
| <b>TET2</b>  | c.1970_1971de<br>ICAinsT | p.Ser657PhefsT<br>er43     | 13.15 | Likely<br>pathogenic | Oncomine            |       |
| <b>TET2</b>  | c.94_95insAGC<br>TA      | p.Thr32LysfsTe<br>r19      | 41.87 | Likely<br>pathogenic | Oncomine            |       |
| <b>TET2</b>  | c.3594delG               | p.Val1199Trpfs<br>Ter27    | 8.86  | Likely<br>pathogenic | Oncomine            |       |
| <b>TET2</b>  | c.3637G>A                | p.Val1213Met               | 53.01 | Pathogenic           | Oncomine            | 1031  |
| <b>TP53</b>  | c.916C>T                 | p.(Arg306*)                | 31.0  | Pathogenic           | Myeloid<br>Solution |       |
| <b>TP53</b>  | c.182A>G                 | p.(Asp61Gly)               | 9.0   | Pathogenic           | Myeloid<br>Solution |       |
| <b>TP53</b>  | c.824G>A                 | p.(Cys275Tyr)              | 45.7  | Pathogenic           | Myeloid<br>Solution |       |
| <b>TP53</b>  | c.707A>G                 | p.(Tyr236Cys)              | 14.1  | Pathogenic           | Myeloid<br>Solution |       |
| <b>TP53</b>  | c.376-2A>G               | p.?                        | 1.56  | Pathogenic           | Oncomine            | 800.6 |
| <b>TP53</b>  | c.578A>G                 | p.His193Arg                | 50.09 | Pathogenic           | Oncomine            | 1113  |
| <b>TP53</b>  | c.646G>A                 | p.Val216Met                | 7.27  | Pathogenic           | Oncomine            |       |
| <b>TP53</b>  | c.559+1G>A               |                            | 4.0   | Pathogenic           | Myeloid<br>Solution |       |
| <b>TP53</b>  | c.559+2T>C               |                            | 10.4  | Likely<br>pathogenic | Myeloid<br>Solution |       |
| <b>U2AF1</b> | c.470A>G                 | p.(Gln157Arg)              | 43.2  | Pathogenic           | Myeloid<br>Solution |       |
| <b>U2AF1</b> | c.470A>G                 | p.(Gln157Arg)              | 49.4  | Pathogenic           | Myeloid<br>Solution |       |
| <b>U2AF1</b> | c.470A>C                 | p.(Gln157Pro)              | 2.1   | Pathogenic           | Myeloid<br>Solution |       |
| <b>U2AF1</b> | c.470A>C                 | p.(Gln157Pro)              | 44.9  | Pathogenic           | Myeloid<br>Solution |       |
| <b>U2AF1</b> | c.101C>T                 | p.(Ser34Phe)               | 43.6  | Pathogenic           | Myeloid<br>Solution |       |
| <b>U2AF1</b> | c.470A>C,<br>c.251A>C    | p.Gln157Pro,<br>p.Gln84Pro | 15.41 | Pathogenic           | Oncomine            |       |
| <b>U2AF1</b> | c.470A>C,<br>c.251A>C    | p.Gln157Pro,<br>p.Gln84Pro | 21.19 | Pathogenic           | Oncomine            | 1084  |
| <b>U2AF1</b> | c.470A>C,<br>c.251A>C    | p.Gln157Pro,<br>p.Gln84Pro | 36.84 | Pathogenic           | Oncomine            |       |
| <b>U2AF1</b> | c.101C>T, c.-<br>8623C>T | p.Ser34Phe, p.?            | 15.64 | Pathogenic           | Oncomine            |       |
| <b>U2AF1</b> | c.101C>T, c.-<br>8623C>T | p.Ser34Phe, p.?            | 43.63 | Pathogenic           | Oncomine            |       |
| <b>ZRSR2</b> | c.376C>T                 | p.(Arg126*)                | 4.4   | Likely<br>pathogenic | Myeloid<br>Solution |       |



|              |              |                    |       |                   |                  |      |
|--------------|--------------|--------------------|-------|-------------------|------------------|------|
| <b>ZRSR2</b> | c.196A>T     | p.(Arg66*)         | 6.5   | Likely pathogenic | Myeloid Solution |      |
| <b>ZRSR2</b> | c.202_203dup | p.(Gln69Glyfs*10)  | 3.2   | Likely pathogenic | Myeloid Solution |      |
| <b>ZRSR2</b> | c.330delA    | p.Gln110HisfsTer55 | 29.44 | Likely pathogenic | Oncomine         |      |
| <b>ZRSR2</b> | c.826T>C     | p.Ser276Pro        | 6.59  | Pathogenic        | Oncomine         | 1233 |

**Supplemental Table S4. Multivariate analysis of risk factors for survival according to type of myelofibrosis**

| Multivariate analysis of risk factors for survival according to type of myelofibrosis |               |        |                    |       |                    |       |                   |        |
|---------------------------------------------------------------------------------------|---------------|--------|--------------------|-------|--------------------|-------|-------------------|--------|
|                                                                                       | PMF<br>N=81   |        | Post-PV MF<br>N=53 |       | Post-ET MF<br>N=41 |       | Total MF<br>N=175 |        |
|                                                                                       | HR<br>(95%CI) | p      | HR<br>(95%CI)      | p     | HR (95%CI)         | p     | HR<br>(95%CI)     | p      |
| Molecular high-risk                                                                   | 3.6 (1.4-9.3) | 0.008  | 1.9 (0.8-4.5)      | 0.1   | 1.5 (0.2-11.7)     | 0.7   | 2.6 (1.4-4.9)     | 0.003  |
| IPSS                                                                                  | 2.1 (1.5-3.0) | <0.001 | -                  | -     | -                  | -     | 1.8 (1.4-2.4)     | <0.001 |
| MYSEC                                                                                 | -             | -      | 1.9 (1.3-2.8)      | 0.001 | 2.4 (1.3-4.4)      | 0.006 | -                 | -      |

PMF: primary myelofibrosis. Post-PV MF: post-polycythemia vera myelofibrosis. Post-ET MF: post-essential thrombocythemia myelofibrosis. MF: myelofibrosis. HR: hazard ratio. CI: confidence intervals. Molecular high-risk: MF with *TP53* disruption of aneuploidy, MF with spliceosome or chromatin mutations and MF with homozygous *JAK2* mutation. IPSS: international prognosis scoring system. MYSEC: myelofibrosis-secondary-to-PV-and ET-prognostic-model

Supplemental Table S5. Multivariate analysis of risk factors for progression to acute leukemia according to type of myelofibrosis

| Multivariate analysis of risk factors for progression to acute leukemia according to type of myelofibrosis |               |     |                    |       |                    |      |                   |       |
|------------------------------------------------------------------------------------------------------------|---------------|-----|--------------------|-------|--------------------|------|-------------------|-------|
|                                                                                                            | PMF<br>N=81   |     | Post-PV MF<br>N=53 |       | Post-ET MF<br>N=41 |      | Total MF<br>N=175 |       |
|                                                                                                            | HR<br>(95%CI) | p   | HR (95%CI)         | p     | HR (95%CI)         | p    | HR (95%CI)        | p     |
| MF with <i>TP53</i> disruption or aneuploidy                                                               | 4.2 (0.5-36)  | 0.2 | 10.1 (2.1-48.4)    | 0.004 | 7.8 (1.1-56.6)     | 0.04 | 5.7 (1.8—18.4)    | 0.004 |
| IPSS                                                                                                       | 1.6 (0.7-3.8) | 0.2 | -                  | -     | -                  | -    | 2.0 (1.1-3.5)     | 0.01  |
| MYSEC                                                                                                      |               |     | 2.3 (1.1-4.7)      | 0.02  | 0.9 (0.3-2.5)      | 0.9  | -                 | -     |

PMF: primary myelofibrosis. Post-PV MF: post-polycythemia vera myelofibrosis. Post-ET MF: post-essential thrombocythemia myelofibrosis. MF: myelofibrosis. HR: hazard ratio. CI: confidence intervals. IPSS: international prognosis scoring system. MYSEC: myelofibrosis-secondary-to-PV-and ET-prognostic-model
